# Supplementary material for: The Expression of TP63 as a Biomarker of Early Recurrence in Resected Esophageal Squamous Cell Carcinoma after Neoadjuvant Chemoradiotherapy
Source: MDPI journal article supplement (doi:10.3390/biomedicines12051101), 2024-05-16
Supplement: s1 [file s1]

**Table S1.** Characteristics of the enrolled 50 ESCC patients form IHC.

| Characteristics                      | Total        | Recurrence   | Non-Recurrence | <i>p</i>           |
|--------------------------------------|--------------|--------------|----------------|--------------------|
| <b>No. of patients</b>               | N = 50       | N = 25       | N = 25         |                    |
| <b>Age (year, mean)</b>              | 54.52 ± 7.71 | 53.32 ± 7.81 | 55.72 ± 7.57   | 0.28 <sup>a</sup>  |
| <b>Gender</b>                        |              |              |                |                    |
| <b>Male</b>                          | 48 (98.0%)   | 23 (92.0%)   | 25 (100.0%)    |                    |
| <b>Female</b>                        | 2 (4.0%)     | 2 (8.0%)     | 0 (0.0%)       |                    |
| <b>Pathologic stage <sup>c</sup></b> |              |              |                |                    |
| <b>I</b>                             | 1 (2.0%)     | 0 (0.0%)     | 1 (100%)       | 0.237 <sup>b</sup> |
| <b>IA</b>                            | 7(14.0%)     | 3 (42.9%)    | 4 (57.1%)      |                    |
| <b>IA2</b>                           | 1 (2.0%)     | 1 (100%)     | 0 (0.0%)       |                    |
| <b>II</b>                            | 1 (2.0%)     | 1 (100%)     | 0 (0.0%)       |                    |
| <b>IIA</b>                           | 3 ( 6.0%)    | 1 (33.3%)    | 2 (66.7%)      |                    |
| <b>IIB</b>                           | 16 (32.0%)   | 4 (25.0%)    | 12 (75.0%)     |                    |
| <b>IIIA</b>                          | 8 (16.0%)    | 6 (75.0%)    | 2 (25.0%)      |                    |
| <b>IIIB</b>                          | 7 (14.0%)    | 5 (71.4%)    | 2 (28.6%)      |                    |
| <b>IIIC</b>                          | 2 (4.0%)     | 2 (100%)     | 0 (0.0%)       |                    |
| <b>IVA</b>                           | 2 (4.0%)     | 1 (50.0%)    | 1 (50.0%)      |                    |

<sup>a</sup> *t*-test analyzed the differences of age between patients with recurrence and non-recurrence ECSS patients.

<sup>b</sup> Chi-square test analyzed the differences in each clinical stage between two groups.

<sup>c</sup> Total *n* = 48 due to missing data for 2 patients.
